# Supplementary material for: Detecting and correcting misclassified sequences in the large-scale public databases
Source: PubMed Central journal article supplement — Bioinformatics. 2020 Jun 24;36(18):4699–705. doi: 10.1093/bioinformatics/btaa586 (PMC7821992; doi:10.1093/bioinformatics/btaa586), 2020-06-24
Supplement: btaa586_supplementary_data.pdf [file btaa586_supplementary_data.pdf]

# 1 Supplementary materials

## 1.1 NR and Clustering Descriptive statistics

Summary statistics of protein clusters, unclustered proteins, proteins, amino acid content and taxonomic assignment for CD-Hit clustering at 95% and then clustering of representative sequences a 90%, 85%, 80%, 75%, 70% and 65% identity, respectively is shown in Table 1.

Table 1: The nr95, nr90, ..., nr65 summary statistics.

| Similarity | Clusters   | Unclustered proteins | Proteins    | #Amino Acids   | #taxa   |
|------------|------------|----------------------|-------------|----------------|---------|
| 95         | 88,276,733 | 64,018,330           | 174,233,775 | 63,580,247,140 | 744,237 |
| 90         | 72,393,597 | 63,135,775           | 88,276,733  | 30,462,708,282 | 231,410 |
| 85         | 61,757,844 | 54,844,642           | 72,393,597  | 24,951,507,349 | 155,471 |
| 80         | 53,308,820 | 47,596,227           | 61,757,844  | 21,255,665,717 | 123,299 |
| 75         | 46,157,068 | 41,246,925           | 53,308,820  | 18,319,406,051 | 106,039 |
| 70         | 40,010,418 | 35,764,294           | 46,157,068  | 15,844,729,956 | 95,704  |
| 65         | 34,451,690 | 30,647,959           | 40,010,418  | 13,712,952,017 | 88,850  |

## 1.2 BoaG queries

Following are the BoaG queries that used in this work to retrieve annotations from protein sequences and clusters. The output of these two queries in Fig. 1 and Fig. 2 were fed into algorithm 1 and algorithm 2 in the paper.

```
1 s: Sequence = input;  
2 count : output sum [string][string] of int;  
3 foreach(i:int; def(s.annotation[i]))  
4   count [s.seqid][s.annotation[i].tax_id] << 1;
```

```
#Following are few lines of the output  
count[12E8][9913] = 6  
count[1BZW][3818] = 44  
count[1C08][83333] = 4
```

Figure 1: Frequency of taxonomic assignment for identifying taxonomically misclassified protein sequences in the NR database. In line 1, s is defined a Sequence type. Line 2, count is an output aggregator that produces the sum of the output indexed over protein sequence ID and taxonomic ID.

```

1 s: Sequence = input;
2 clstrOut : output sum [int][string][string] of int;
3 foreach(i:int; def(s.annotation[i]))
4   foreach(j:int; def(s.cluster[j]))
5     clstrOut[s.cluster[j].similarity][s.cluster[j].cid] [s.annotation
[i].tax_name]<< 1;

```

```

#Following are few lines of output
clstrOut[95][9667021][Mycoplasma gallisepticum] = 20
clstrOut[95][9667086][Lactobacillus helveticus] = 60
clstrOut[95][10025876][Okarito brown kiwi] = 21

```

Figure 2: Frequencies of taxonomic assignments for each cluster in different similarity level. The variable clstrOut is output aggregators that produces the sum of output indexed over similarity level, cluster id, and taxonomic name

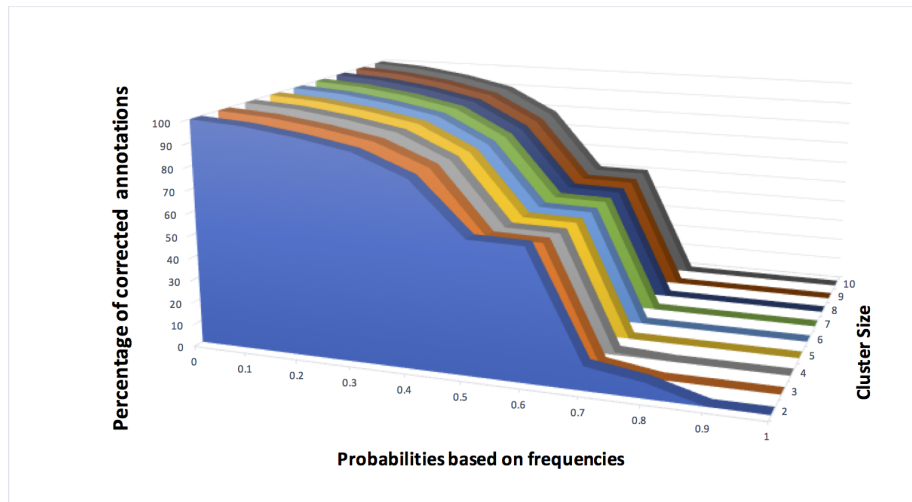

Figure 3: The input parameters to the sensitivity analysis are probability based on the annotation frequencies and the cluster size. The Z-axis shows for what percentages of the misclassified sequences, our approach can propose taxonomic assignment.

### 1.3 Sensitivity analysis

### 1.4 Misclassified sequences at clusters

Table 2 shows the number of potential misclassified sequences in the clusters at 95% similarity at the superkingdom level to the family level that has been detected by applying distance in the phylogenetic tree. The second column shows the number of entire clusters that have a certain number of taxonomic assignments.

Table 2: Misclassification in clusters of the NR database at 95% similarity.

| # taxa | total      | Root   | kingdom | Phylum  | Class   | Order   | Family  |
|--------|------------|--------|---------|---------|---------|---------|---------|
| 2      | 12,960,476 | 17,099 | 92,526  | 263,844 | 100,560 | 267,251 | 461,795 |
| 3      | 4,683,663  | 9,825  | 39,940  | 153,678 | 63,414  | 153,996 | 291,418 |
| 4      | 2,328,246  | 7,314  | 25,361  | 95,038  | 33,603  | 102,671 | 173,810 |
| 5      | 1,293,767  | 5,136  | 17,915  | 56,510  | 22,253  | 62,025  | 101,675 |
| 6      | 566,574    | 4,936  | 14,660  | 39,410  | 15,738  | 46,913  | 66,741  |
| 7      | 566,574    | 3,652  | 13,642  | 23,206  | 12,160  | 40,760  | 49,046  |
| 8      | 403,513    | 2,719  | 8,433   | 10,622  | 10,577  | 24,259  | 36,463  |
| 9      | 289,289    | 1,635  | 6,655   | 7,291   | 8,890   | 19,608  | 28,549  |
| 10     | 235,451    | 1,423  | 4,744   | 8,991   | 8,586   | 16,070  | 22,026  |
| ≥10    | 1,832,313  | 22,921 | 63,513  | 3,951   | 65,196  | 155,804 | 200,642 |

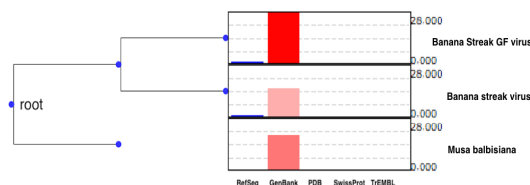

Figure 4: Misclassification detected in the cluster ID 490503 at 95% similarity of the NR dataset.

Figure 4 shows an example of detected taxonomically assigned annotations in the cluster-id 490503. Leaves are annotated with databases of origins and frequency of taxonomic assignments as a bar chart from all reviewed and unreviewed databases, i.e., RefSeq, GenBank, PDB UniProt\SwissProt, and UniProt\TrEMBL respectively. For this cluster, there is no annotation from PDB, SwissProt, and TrEMBL databases.

## 1.5 Correcting Taxonomic Misclassification

Figure 5 shows different percentages of conflicts from the subset of one million sequences in the NR database.

## 1.6 Case study: Glycine

In addition to the simulated and real-world datasets, we also explored more deeply some clusters that had *Glycine* to identify a very small subset of clusters that had a high probability of containing sequences with a taxonomic misclassification. We did this by making some basic assumptions and applying very stringent filters to pull out five clusters and explore them in detail. The five clusters we identified were at the 95% similarity level and had at least one protein with the genus *Glycine* in the cluster, and at least one other genus but not more than eight different genera and the proteins were not functionally annotated as *ribosomal proteins*. The cluster ids at 95% similarity

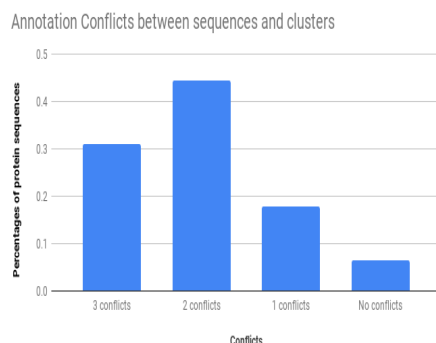

Figure 5: Conflicts between the set of top three taxonomic assignment in sequences and the top three taxonomic assignment in the clusters of the NR database.

that were identified are 13741561, 26559833, 37311095, 64827049 and 81606138. Each one of these clusters happened to contain a single protein sequence that was taxonomically classified in the genus *Glycine*.

These protein sequence ids are AAL67577, KHN16331, KHN42910, KHN24658, and KHN25027. The remaining protein sequence ids in these clusters were taxonomically classified with bacterial genera or synthetic construct. These protein sequence ids grouped by clusterid (protein ids) are:

- 13741561 (2GGD, 2PQB, 2PQD, AAB36219, AAL67577, ABY76172, AEP17820, AII71485, AMM72836, ARW80139, ARW80140, CBG92008, KIF05476, Q9R4E4, WP\_037405162, WP\_050745479, WP\_117368106)
- 26559833 (EEV24075, KHN25027, WP\_062335070, WP\_076776357, WP\_101965181)
- 37311095 (KHN24648, WP\_007116868, WP\_062330154, WP\_065252519, WP\_100269819)
- 64827049 (KHN42910, PZO92494, WP\_007115888, WP\_060994472, WP\_062331401, WP\_065253003, WP\_065264285, WP\_101963455)
- and 81606138 (KHN16331, WP\_007115622, WP\_060994515, WP\_065262776)

In cluster 13741561, the one protein with a *Glycine* taxonomic assignment is AAL67577 and has a length of 455 AA. It aligns with the cluster's representative sequence from amino acid 77 to 455. The protein sequence AEP17820 is also in the cluster and aligns to the representative sequence between 1 and 76, and it is annotated as an expression vector. Many other sequences in the cluster are labeled as synthetic constructs suggesting AAL67577 may be a synthetic construct created by recombinant DNA techniques. Exploring AAL67577 further using NCBI's new SMARTBLAST tool reveals that it is most similar to proteins in bacterial species with almost full coverage of the alignment length. A strong indication that this protein is indeed misclassified. More details about the clusters, sequences, and the SMARTBLAST output are shown in our repository.
